# Supplementary material for: Regulation of signaling directionality revealed by 3D snapshots of a kinase:regulator complex in action
Source: eLife journal article supplement (doi:10.7554/elife.21422), 2016-12-12
Supplement: supp [file elife-21422-supp-v1.zip]

Archive with 8 entries (8 files):
- elife_poa_e21422_Figure_4_figure_supplement_2.pdf
- elife_poa_e21422_Figure_3_figure_supplement_1.pdf
- elife_poa_e21422_Figure_1_figure_supplement_1.pdf
- elife_poa_e21422_Figure_4_figure_supplement_1.pdf
- elife_poa_e21422_Figure_2_figure_supplement_1.pdf
- elife_poa_e21422_Video_1.mov
- elife_poa_e21422_Figure_4_figure_supplement_3.pdf
- elife_poa_e21422_Figure_2_figure_supplement_2.pdf
