# Supplementary figures and images for: Regulation of signaling directionality revealed by 3D snapshots of a kinase:regulator complex in action
Source: eLife journal article supplement (doi:10.7554/elife.21422), 2016-12-12

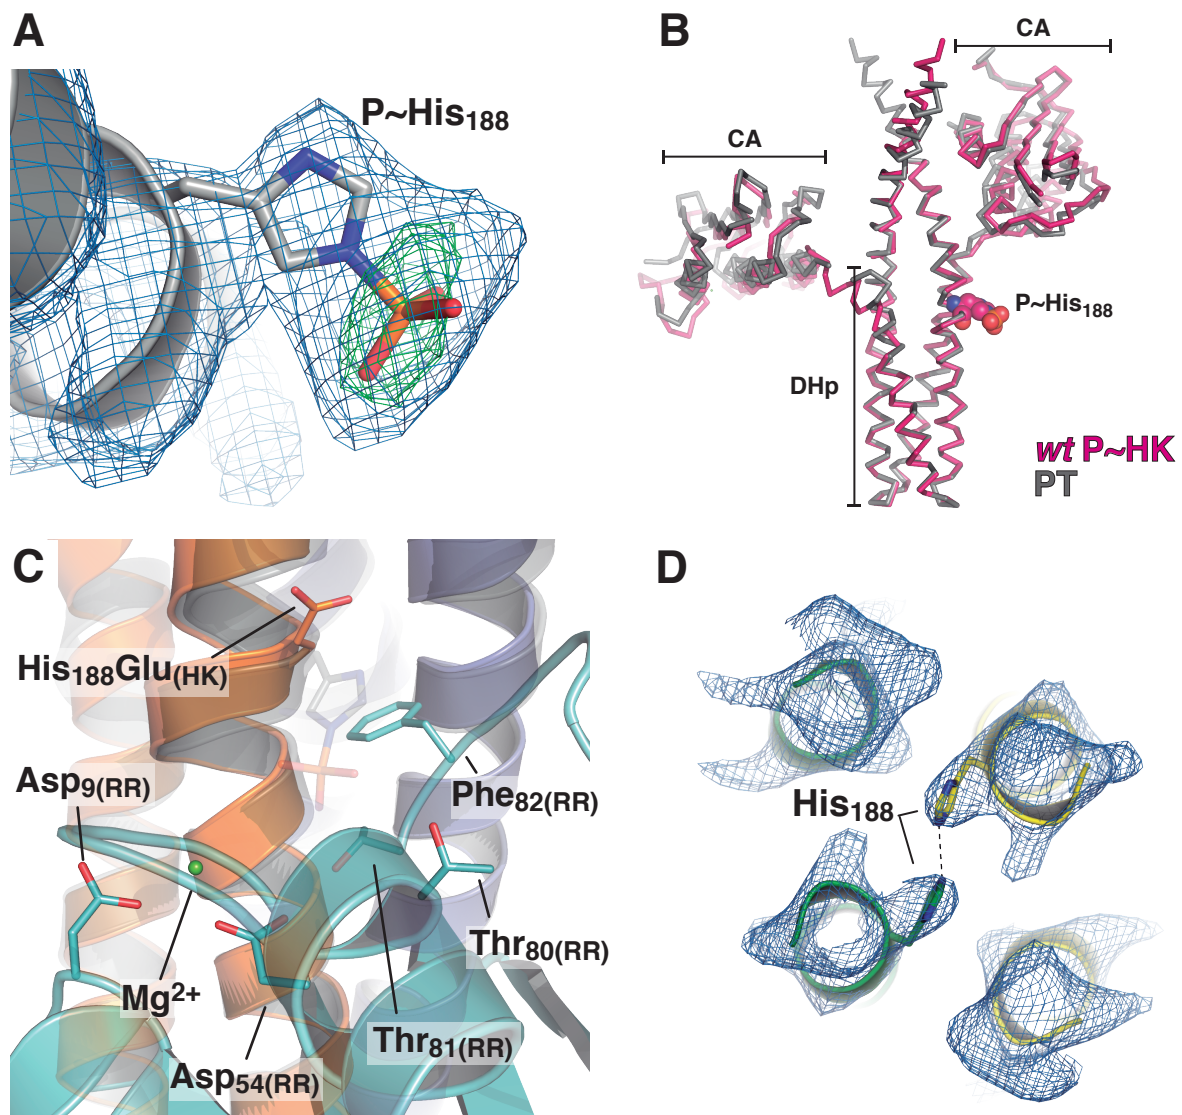

Figure 4-figure supplement 1

Supplement: supp [file elife-21422-supp-v1.zip]

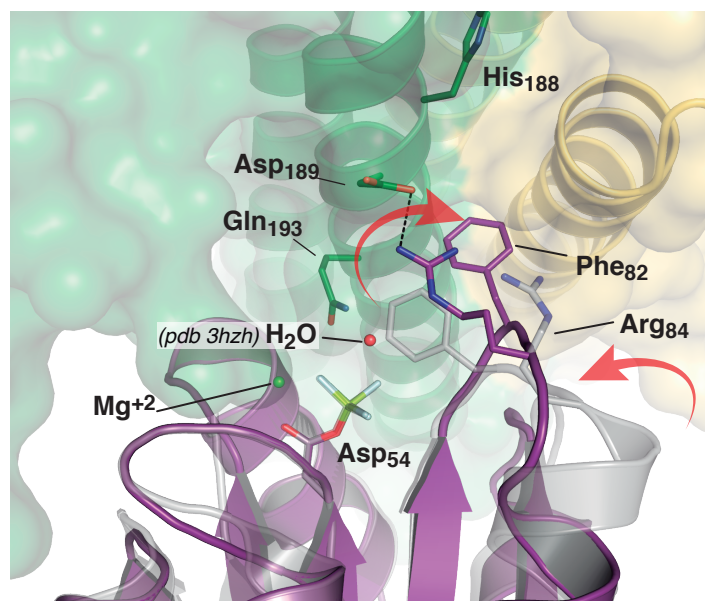

Figure 4-figure supplement 3

Supplement: supp [file elife-21422-supp-v1.zip]

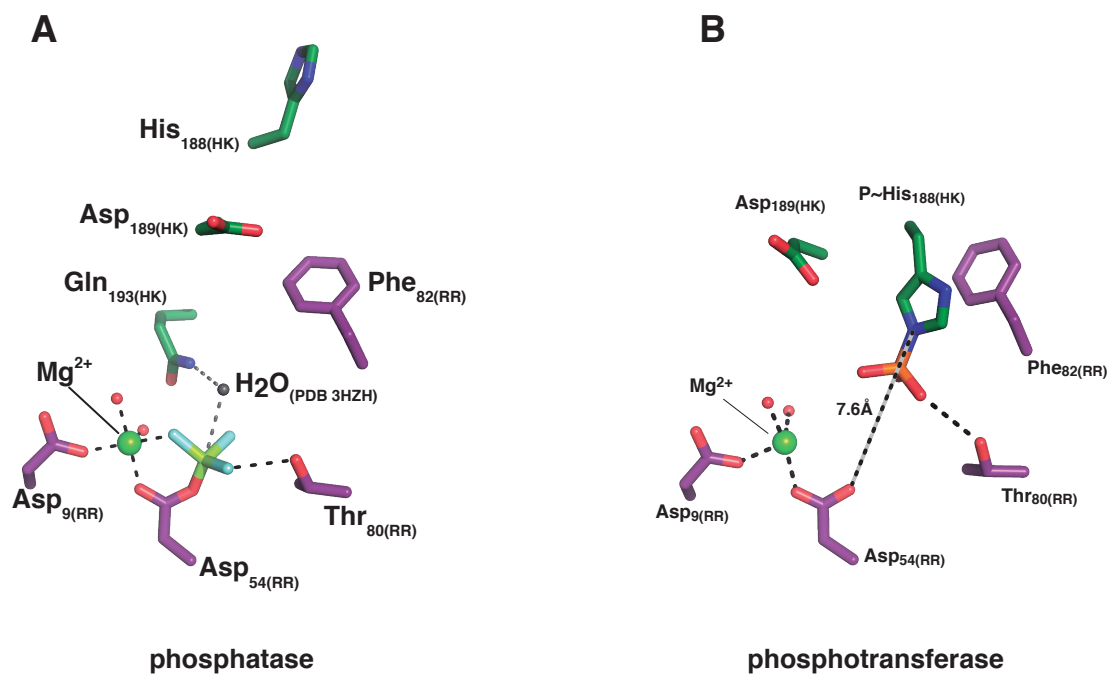

Figure 4-figure supplement 2

Supplement: supp [file elife-21422-supp-v1.zip]

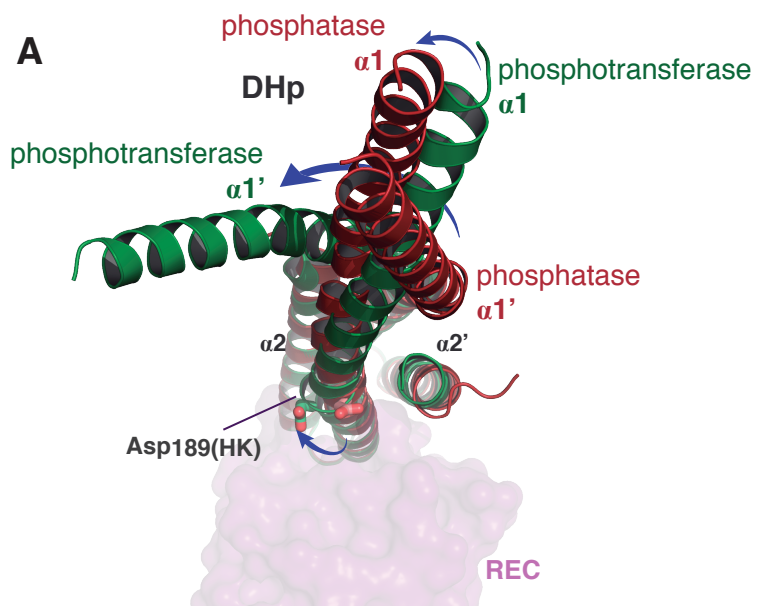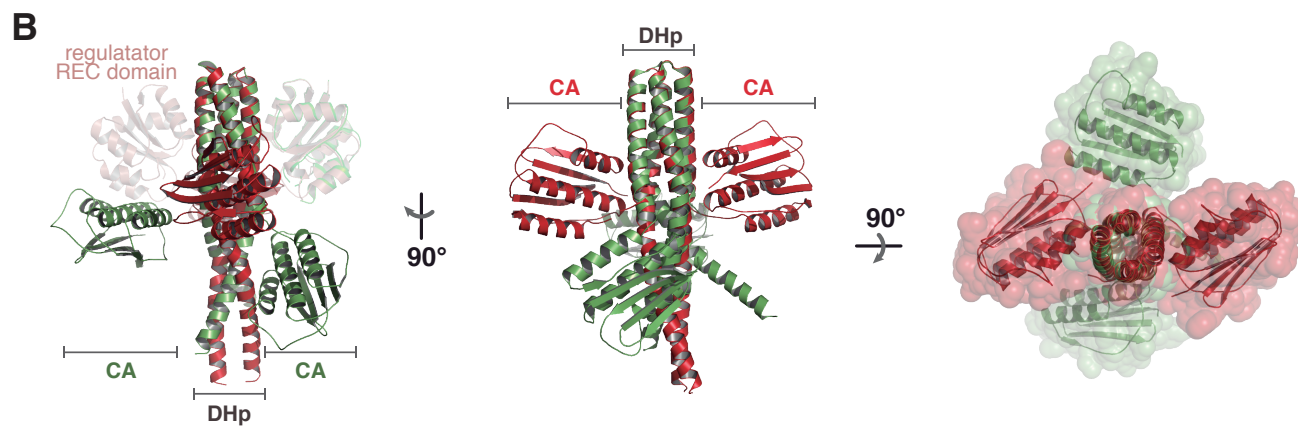

Figure 3-figure supplement 1

Supplement: supp [file elife-21422-supp-v1.zip]

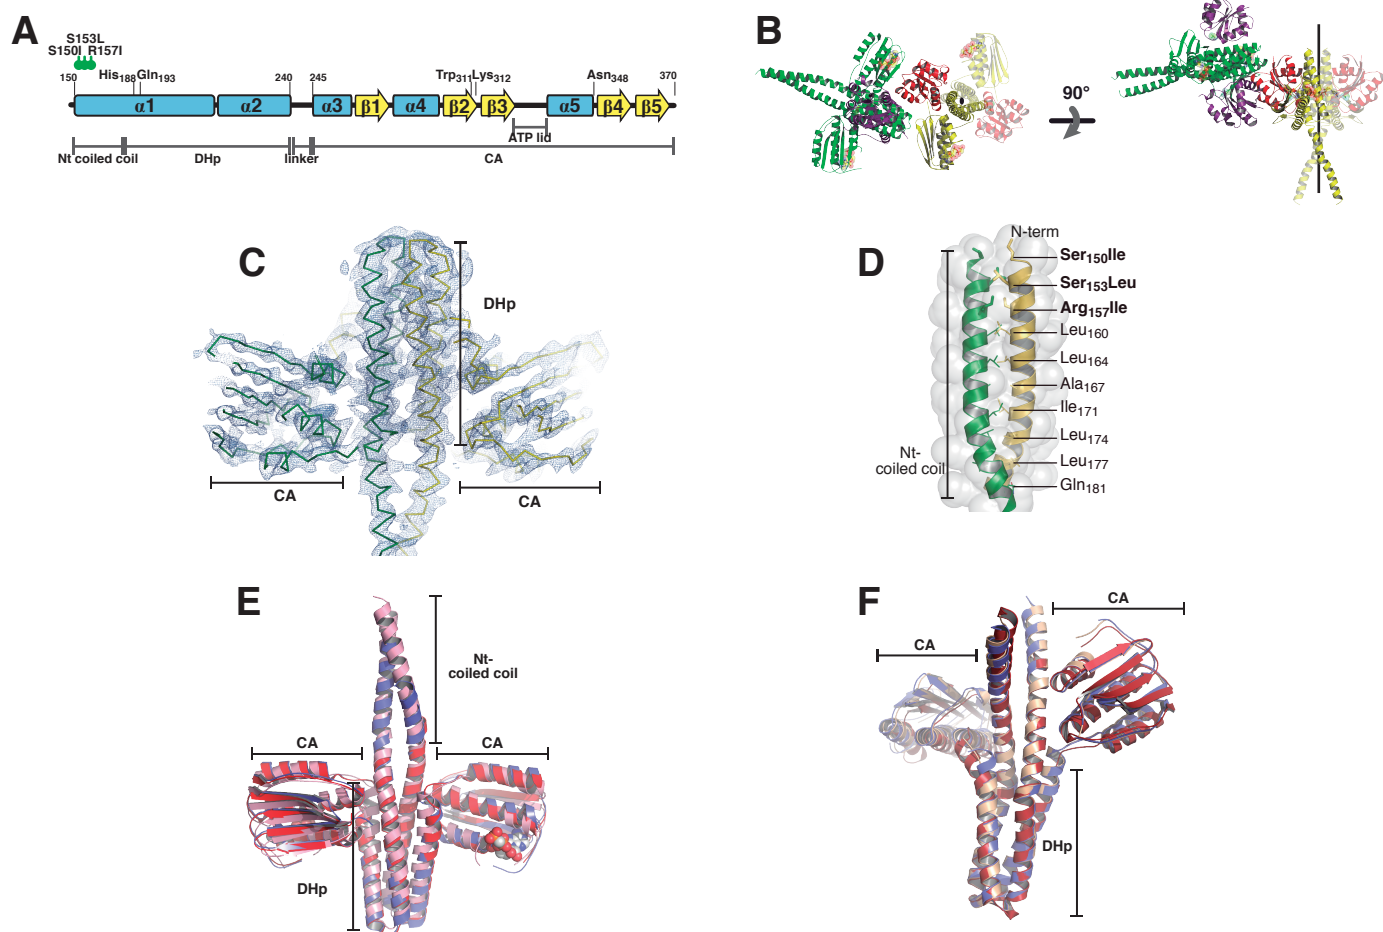

Figure 1-figure supplement 1

Supplement: supp [file elife-21422-supp-v1.zip › elife_poa_e21422_Figure_1_figure_supplement_1.pdf]

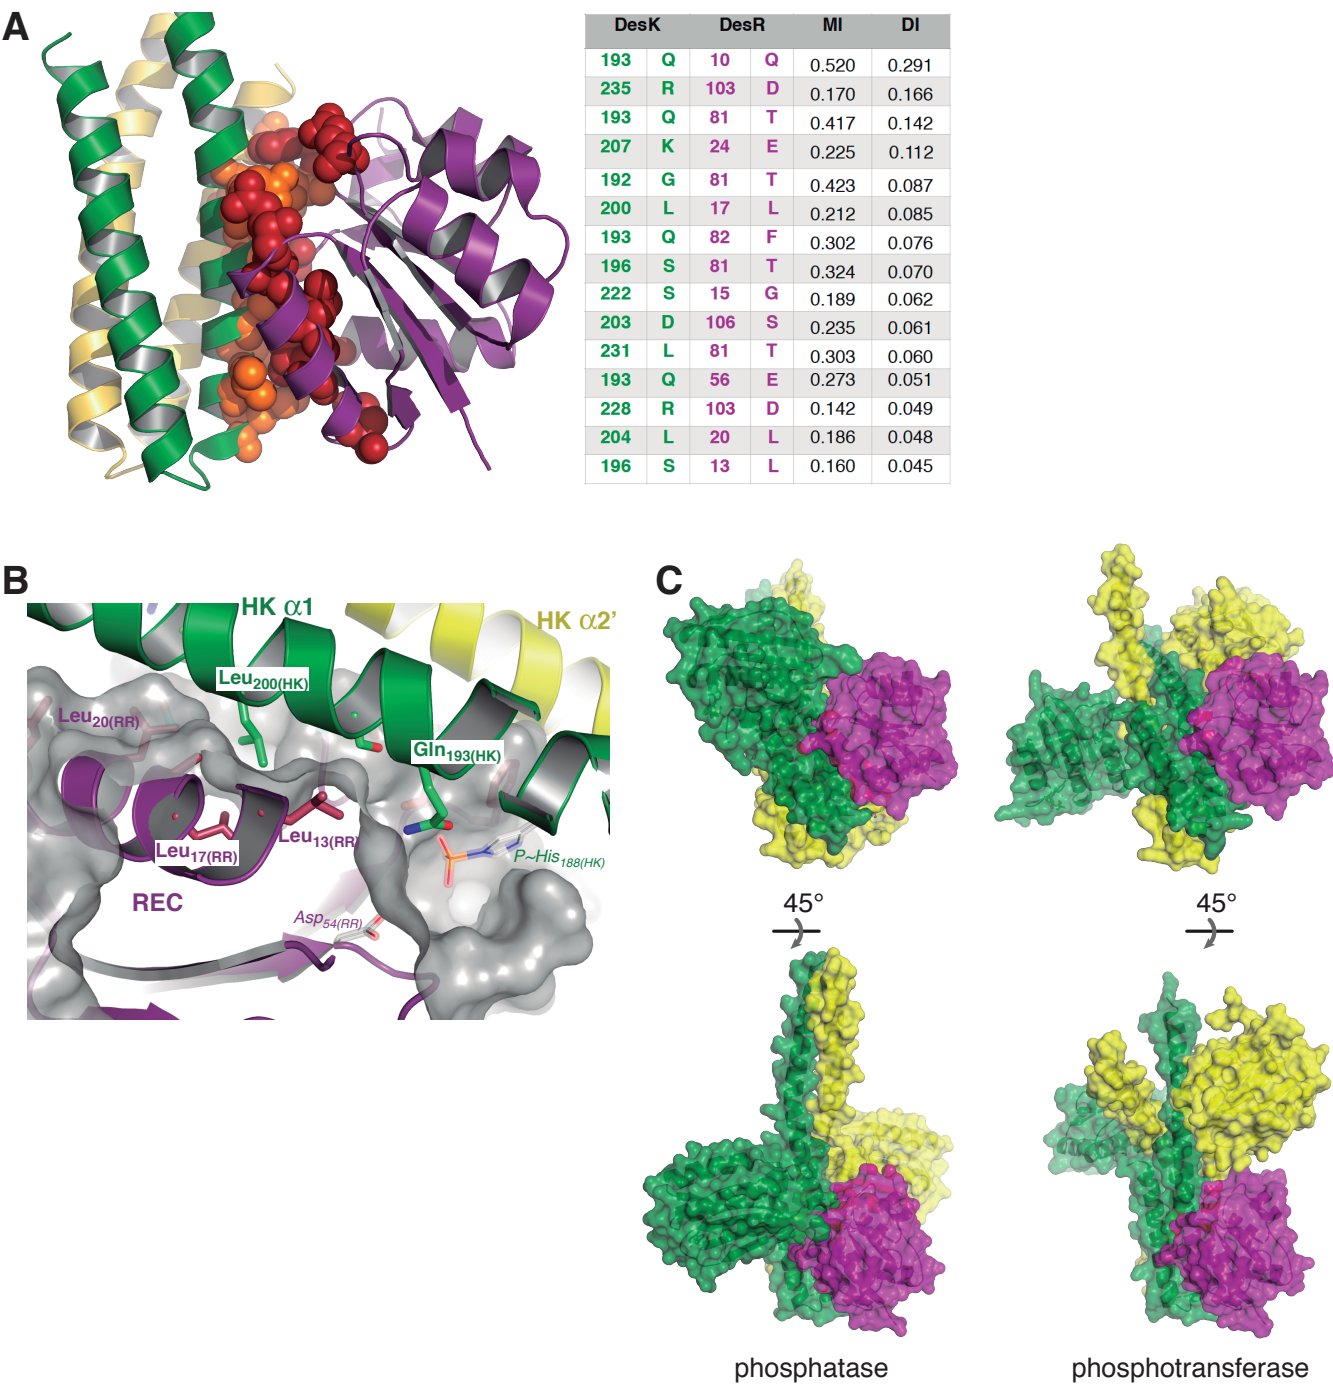

Figure 2-figure supplement 1

Supplement: supp [file elife-21422-supp-v1.zip › elife_poa_e21422_Figure_2_figure_supplement_1.pdf]

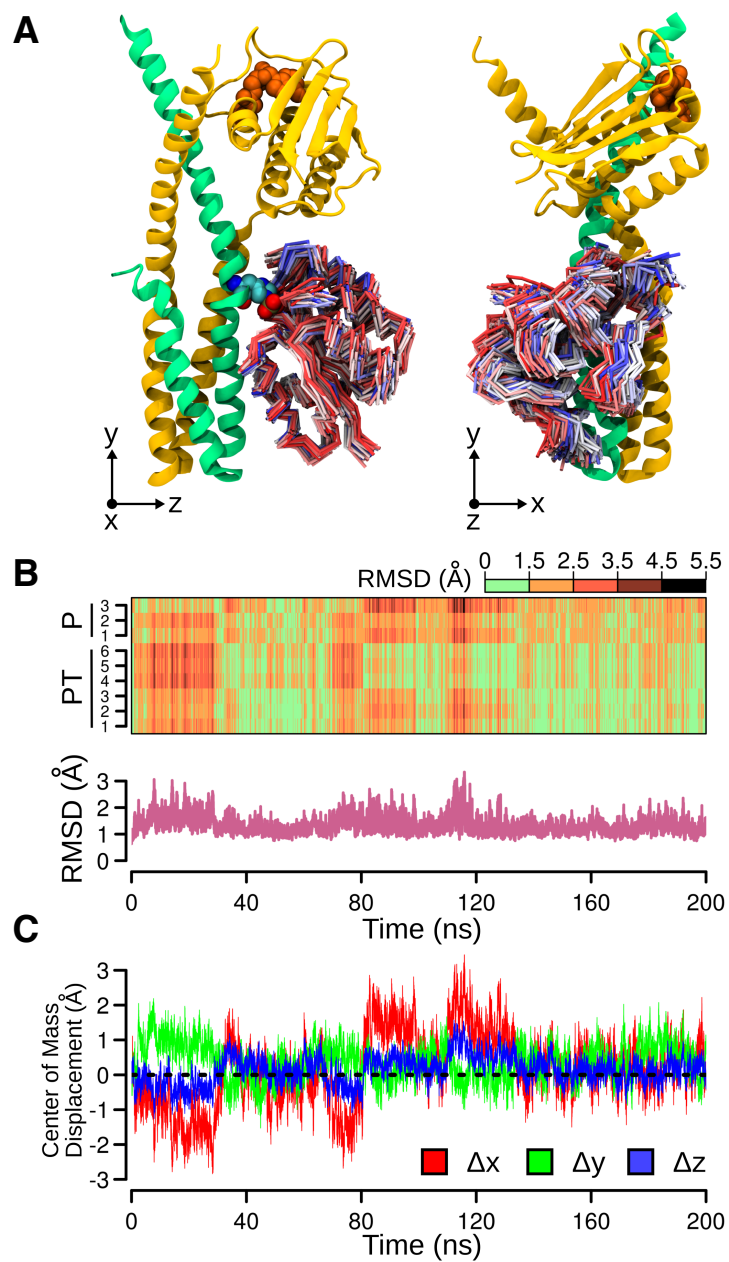

**Figure 2-figure supplement 2**

Supplement: supp [file elife-21422-supp-v1.zip › elife_poa_e21422_Figure_2_figure_supplement_2.pdf]
